# Supplementary material for: Synthesis and elucidation of local structure in phase-controlled colloidal tin phosphide nanocrystals from aminophosphines
Source: Royal Society of Chemistry journal article supplement (doi:10.1039/d2ma00010e), 2022-11-14
Supplement: d2ma00010e1.pdf [file d2ma00010e1.pdf]

1 **Supplementary Information**

2 **Synthesis and Elucidation of Local Structure in Phase-Controlled Colloidal Tin Phosphide**  
3 **Nanocrystals from Aminophosphines**

4  
5 **Authors:** Ingrid J. Paredes<sup>1</sup>, Amani M. Ebrahim<sup>2</sup>, Rito Yanagi<sup>1,3,4</sup>, Anna M. Plonka<sup>2</sup>, Shuzhen  
6 Chen<sup>1</sup>, Hanlu Xia<sup>1</sup>, Scott Lee<sup>1</sup>, Mersal Khwaja<sup>1</sup>, Haripriya Kannan<sup>1</sup>, Ajay Singh<sup>5</sup>, Sooyeon  
7 Hwang<sup>6</sup>, Anatoly I. Frenkel<sup>2,7</sup>, Ayaskanta Sahu<sup>1</sup>

8  
9 **Affiliations:**

10 <sup>1</sup>Department of Chemical and Biomolecular Engineering, New York University Tandon School of  
11 Engineering, 6 Metrotech Center, Brooklyn, New York, 11201, United States

12 <sup>2</sup>Department of Materials Science and Chemical Engineering, Stony Brook University, Stony  
13 Brook, New York 11794, United States

14 <sup>3</sup>Department of Chemical and Environmental Engineering, Yale University, New Haven,  
15 Connecticut, 06520, United States.

16 <sup>4</sup>Energy Sciences Institute, Yale University, 810 West Campus Drive, West Haven, Connecticut,  
17 06516, United States

18 <sup>5</sup>Center for Integrated Nanotechnologies, Material Physics and Applications Division, Los Alamos  
19 National Laboratory, Los Alamos, New Mexico 87545, United States

20 <sup>6</sup>Center for Functional Nanomaterials, Brookhaven National Laboratory, Upton, New York 11973,  
21 United States

22 <sup>7</sup>Chemistry Division, Brookhaven National Laboratory, Upton, New York 11973, United States

23

24

25 \*Correspondence to: [asahu@nyu.edu](mailto:asahu@nyu.edu), [anatoly.frenkel@stonybrook.edu](mailto:anatoly.frenkel@stonybrook.edu)

## 1 **1. Characterization**

### 2 **1.1 X-ray Diffraction (XRD)**

3 XRD characterization was performed using a Bruker AXS D8 DISCOVER GADDS  
4 Microdiffractometer with Cu K $\alpha$  radiation ( $\lambda = 0.154$  nm). Samples were prepared by drop casting  
5 a concentrated solution of nanoparticles from toluene onto a 1 cm x 1 cm <100> silicon substrate  
6 inside of a nitrogen filled glovebox. XRD scans were collected using an incident angle of  $\omega = 18^\circ$ .  
7 XRD data was processed using GSAS-II software.<sup>1</sup>

#### 8 **1.1.2 Scherrer Analysis**

9  
10 The crystal grain size,  $\tau$ , is given by

$$11 \quad \tau = \frac{K\lambda}{\beta \cos\theta}$$

12 where  $K$  is the dimensionless Scherrer constant,  $\lambda$  is the X-ray wavelength in nm,  $\beta$  is the line  
13 broadening (FWHM) and  $\theta$  is the Bragg angle in radians. In our analysis,  $K = 0.9$  and  $\lambda = 0.154$   
14 nm.  $\beta$  was approximated from a Gaussian fit of diffraction peaks. The final crystal grain size was  
15 obtained by taking an average estimation from several peaks. For Sn<sub>4</sub>P<sub>3</sub> nanocrystals, using the  
16 characteristic peak at  $2\theta = 31^\circ$ , a Gaussian fit provided  $\beta = 0.514^\circ$ , providing a  $\tau = 20.2$  nm.

### 17 **1.2 Transmission Electron Microscopy (TEM)**

18 TEM samples were prepared on 300 mesh formvar/carbon grids (Ted Pella, FCF300-Cu-UA).  
19 Bright field TEM images were obtained using a Tecnai Spirit 120kV TEM. The particle size  
20 distribution of each sample was determined using the ImageJ software.<sup>2</sup> For high resolution TEM  
21 (HRTEM), samples were prepared by drop casting a dilute filtered solution of nanoparticles  
22 dispersed in hexanes onto a TEM grid. Images were taken using a FEI Titan Themis 200 kV TEM.  
23 Scanning transmission electron microscopy (STEM) images and energy dispersive X-ray (EDX)

1 measurements were acquired with a Hitachi HD2700C dedicated STEM with a probe Cs corrector  
2 at an accelerating voltage of 200 kV.

### 3 **1.3 X-ray Photoelectron Spectroscopy (XPS)**

4 XPS data was measured using a Versa Probe II XPS from Physical Electronics with Al K $\alpha$  source  
5 operated at 50 W and 15 kV with an energy resolution of 700 meV and 200  $\mu$ m spot size. Samples  
6 were prepared by drop casting a solution of nanoparticles onto a 1 cm x 1 cm glass slide (Thin  
7 Film Devices). The data was processed using MultiPak Data Reduction software, in which sample  
8 spectra were calibrated to the carbon spectrum.

### 9 **1.4 X-ray Absorption Spectroscopy (XAS)**

10 X-ray absorption measurements were conducted at the 7-BM (Quick Absorption and Scattering,  
11 QAS) beamline at NSLS-II. Samples were prepared by drop casting dispersions of nanoparticles  
12 from toluene, and drying them to make thick films onto pieces of Kapton. The Kapton pieces were  
13 then folded and sealed with Kapton tape under an inert nitrogen atmosphere prior to sample  
14 loading. Extended X-ray absorption fine structure (EXAFS) measurements at the Sn K-edge were  
15 performed in transmission mode using a Si (111) crystal monochromator detuned by 20%. Sn foil  
16 was used for calibration and alignment of all data in X-ray energy. The ionization chambers were  
17 filled with 90% Ar and 10% N<sub>2</sub>.

18 EXAFS data was processed using the Demeter software package (Athena and Artemis).<sup>3</sup> The  
19 collected XAS spectra were aligned, merged, normalized, and background subtracted in Athena.  
20 The theoretical EXAFS spectra were then constructed using the FEFF6 code incorporated in  
21 Artemis. The fitting was performed in r-space using a Hanning window applied to the k<sup>2</sup>- weighted  
22 data. The amplitude reduction factor ( $S_0^2$ ) was obtained from fitting EXAFS data for the Sn foil  
23 collected at QAS fitted to Sn metal (ICSD-236667) and was determined to be  $1.1 \pm 0.2$ . Corrections

1 to the theoretical photoelectron energy ( $\Delta E_0$ ), the nearest coordination number (N), and the  
 2 disorder term ( $\sigma^2$ ) were varied during the fits.

## 3 2. Supplementary Figures and Tables

5 **Table S1.** Legend of Phases and Figures

| Phase                          | Corresponding Figures                                         |
|--------------------------------|---------------------------------------------------------------|
| SnP                            | Figure 3, Figure 6, Figure 7, Figure 8a, Figure 8b            |
| Sn <sub>4</sub> P <sub>3</sub> | Figure 4, Figure, Figure 7, Figure 8c, Figure 8d              |
| Sn <sub>3</sub> P <sub>4</sub> | Figure 5, Figure 6, Figure 7, Figure 8e, Figure 8d, Figure S7 |

7 **Table S2.** List of the structure models used in the EXAFS fitting approach.

| Model                          | Identifier                       | Structure and Space Group | Coordination Environment (Number) | Radial Distance (Å) |
|--------------------------------|----------------------------------|---------------------------|-----------------------------------|---------------------|
| SnP                            | ICSD-16077                       | Tetragonal<br>I 4 m m     | Sn-P (3)                          | 2.63                |
| SnP                            | ICSD-69026                       | Trigonal<br>P -3 m 1      | Sn-P (2)<br>Sn-P (1)              | 1.96<br>2.52        |
| Sn <sub>3</sub> P <sub>4</sub> | Huang <i>et al.</i> <sup>4</sup> | Trigonal<br>P 3 1 c       | Sn-P (1)<br>Sn-P (3)              | 2.48<br>2.52        |
| Sn <sub>3</sub> P <sub>4</sub> | COD-4001104                      | Hexagonal<br>R -3 m       | Sn-P (12)                         | 2.68                |
| Sn <sub>4</sub> P <sub>3</sub> | ICSD-15014                       | Rhombohedral<br>R -3 m H  | Sn-P (3)                          | 2.66                |
| SnO                            | ICSD-16481                       | Tetragonal<br>P 4 / n m m | Sn-O (1)                          | 1.84                |



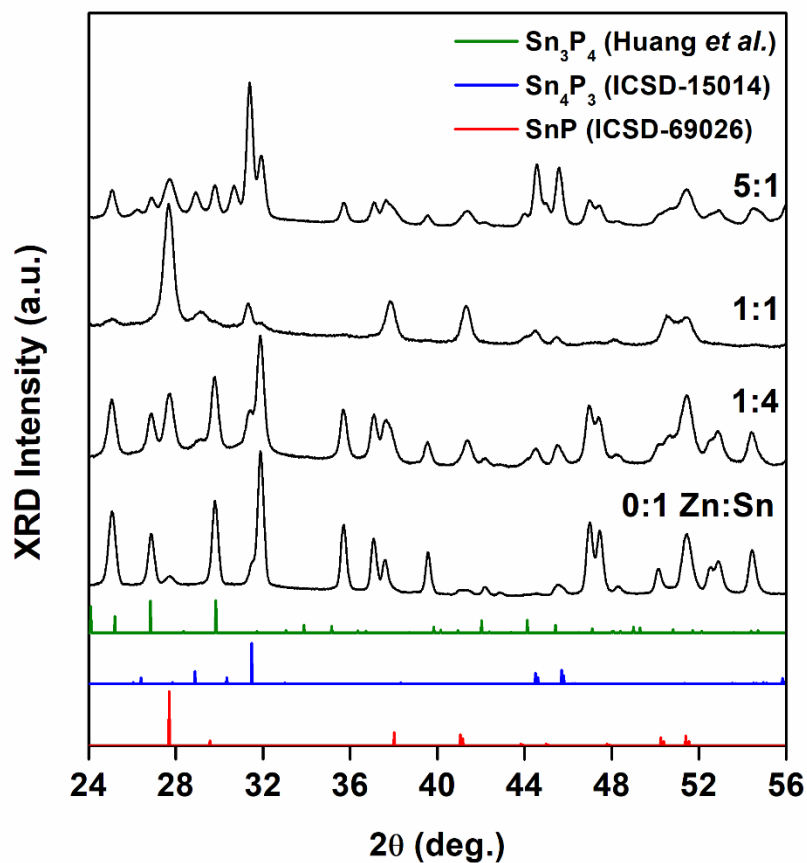

1

2 **Figure S1.** The effect of the ratio of zinc to tin on reaction products. X-ray diffraction data (XRD)  
 3 for nanoparticles synthesized in the absence of ZnCl<sub>2</sub>, a 1:4 ratio, a 1:1 ratio, and a 5:1 ratio of  
 4 ZnCl<sub>2</sub>:SnCl<sub>2</sub>, are shown. All other reaction parameters were held constant across syntheses. Data  
 5 are plotted against reference data for SnP (ICSD-69026), Sn<sub>4</sub>P<sub>3</sub> (ICSD-15014), and Sn<sub>3</sub>P<sub>4</sub> (Huang  
 6 *et al.*<sup>4</sup>). At all ratios, we obtained phase-mixtures of various tin phosphides.

7

8

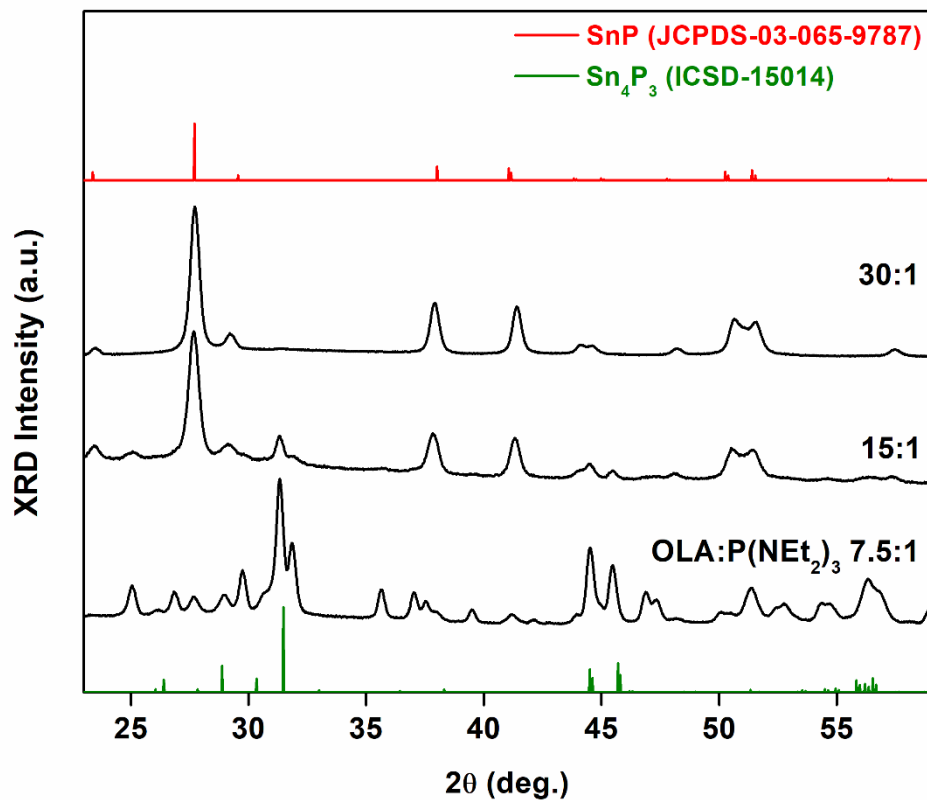

1

2 **Figure S2.** The effect of the amount of oleylamine (OLA) on reaction products. X-ray diffraction  
 3 data (XRD) for nanoparticles synthesized in a 7.5:1, 15:1, and 30:1 ratio of OLA to  
 4 trisdiethylaminophosphine (P(NEt<sub>2</sub>)<sub>3</sub>), are shown. All other reaction parameters were held constant  
 5 across experiments. The data is plotted against reference data for SnP (JCPDS-69026) and Sn<sub>4</sub>P<sub>3</sub>  
 6 (ICSD-15014). Increasing the ratio of oleylamine to P(NEt<sub>2</sub>)<sub>3</sub> drove the reaction pathway towards  
 7 SnP. At the highest ratio of oleylamine to P(NEt<sub>2</sub>)<sub>3</sub>, we obtained a phase pure SnP.

8

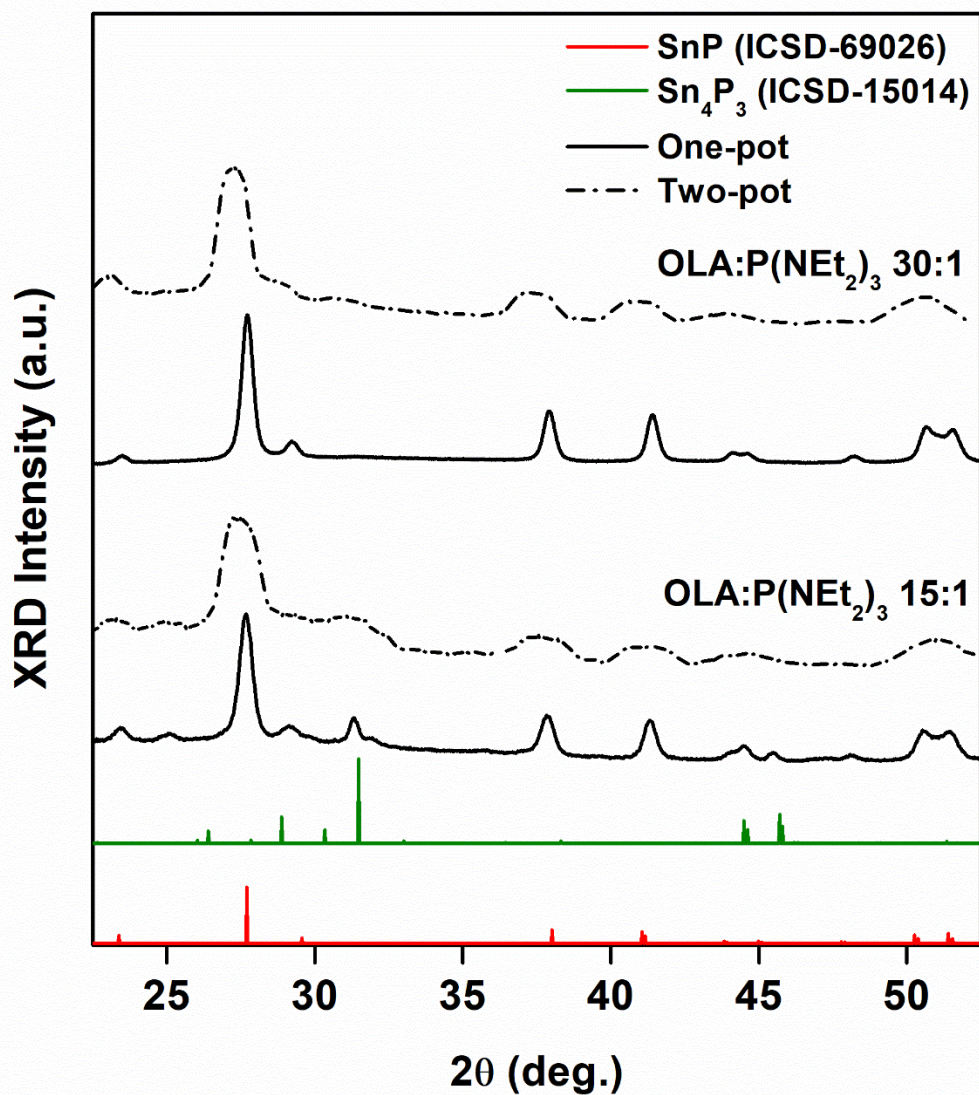

1  
 2 **Figure S3.** Phase data for tin phosphide nanocrystals grown under one-pot (solid) and two-pot  
 3 (dashed) conditions. The data showed a similar trend regardless of method; increasing the ratio of  
 4 oleylamine (OLA) to trisdiethylaminophosphine ((PNEt<sub>2</sub>)<sub>3</sub>) shifted the reaction towards phase-  
 5 pure SnP nanocrystals.

6



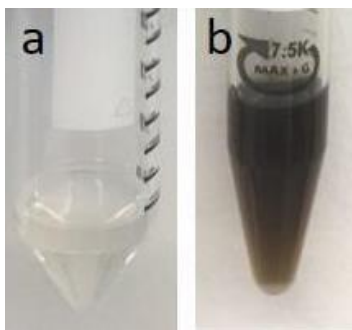

1  
 2 **Figure S4.** Dispersion of nanoparticles in toluene after filtration through 0.2  $\mu\text{m}$  PTFE membrane  
 3 from (a) synthesis without oleic acid, in which case particles aggregated and did not filter, and (b)  
 4 synthesis with oleic acid, in which particles filtered.

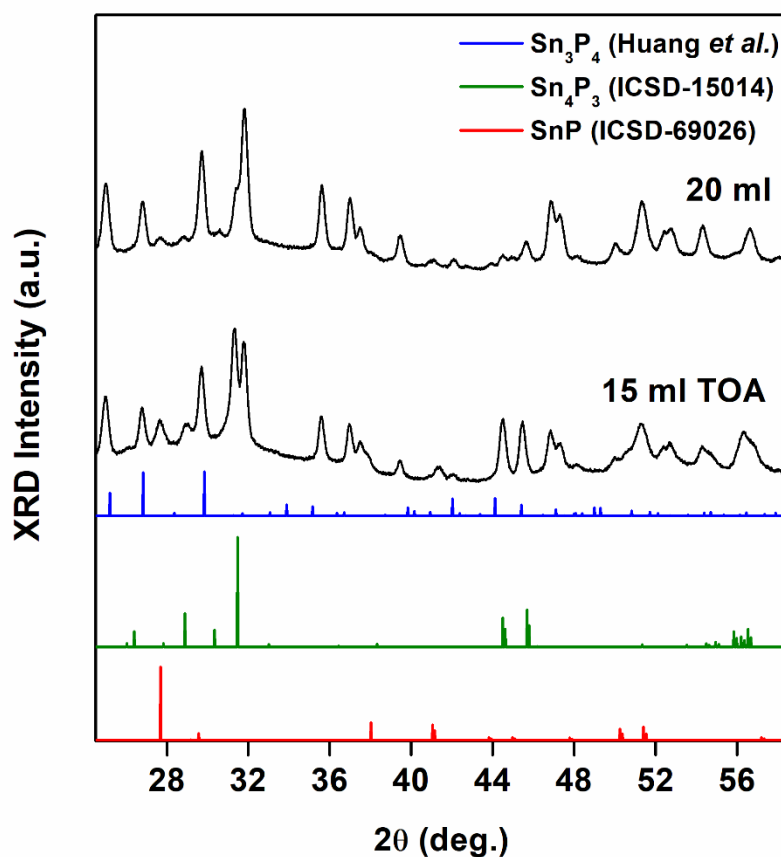

5  
 6 **Figure S5.** X-ray diffraction (XRD) data for tin phosphide nanocrystals grown in the presence of  
 7 varying amounts of trioctylamine (TOA) (15 mL, 20 mL,) for 2 minutes at 250°C following  
 8 injection of trisdiethylaminophosphine.  $\text{P}(\text{NEt}_2)_3$  for 2 minutes at 250°C. Data is plotted against  
 9 reference data for  $\text{Sn}_4\text{P}_3$  (ICSD-15014),  $\text{SnP}$  (ICSD-69026), and  $\text{Sn}_3\text{P}_4$  (Huang *et al.*<sup>4</sup>).

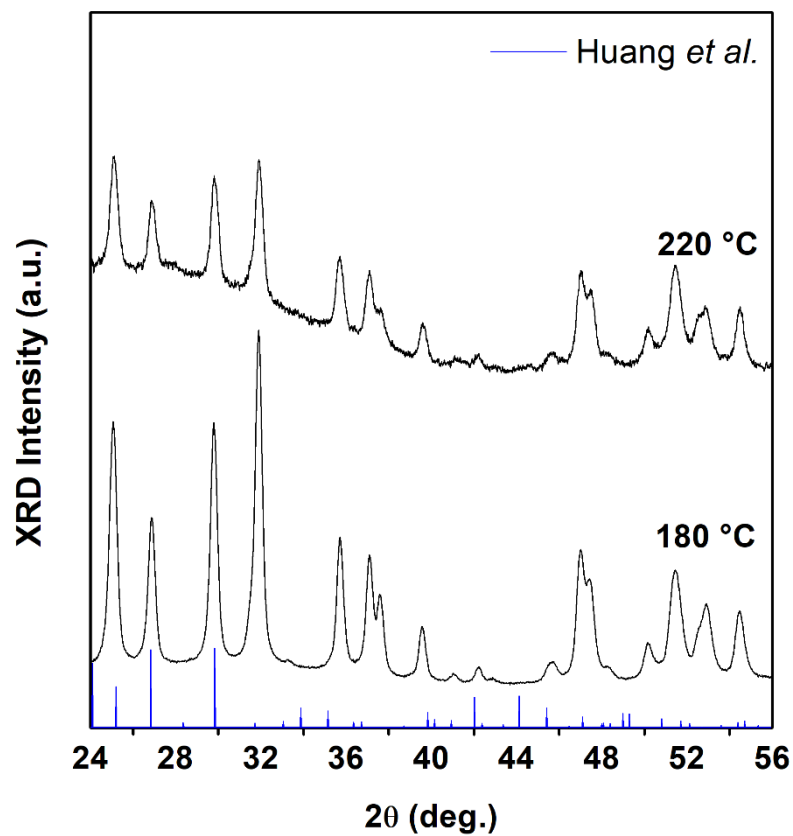

1

2 **Figure S6.** The effect of temperature on reaction products. X-ray diffraction (XRD) data for tin  
3 phosphide nanocrystals grown for 2 min at 250 °C following injection of  
4 trisdiethylaminophosphine (PNEt<sub>2</sub>)<sub>3</sub> into 20 mL of oleylamine and equimolar amounts of SnCl<sub>2</sub>  
5 and ZnCl<sub>2</sub> at 180 °C and 220 °C. The data were comparable to a trigonal Sn<sub>3</sub>P<sub>4</sub> structure predicted  
6 by Huang *et al.*

7

8

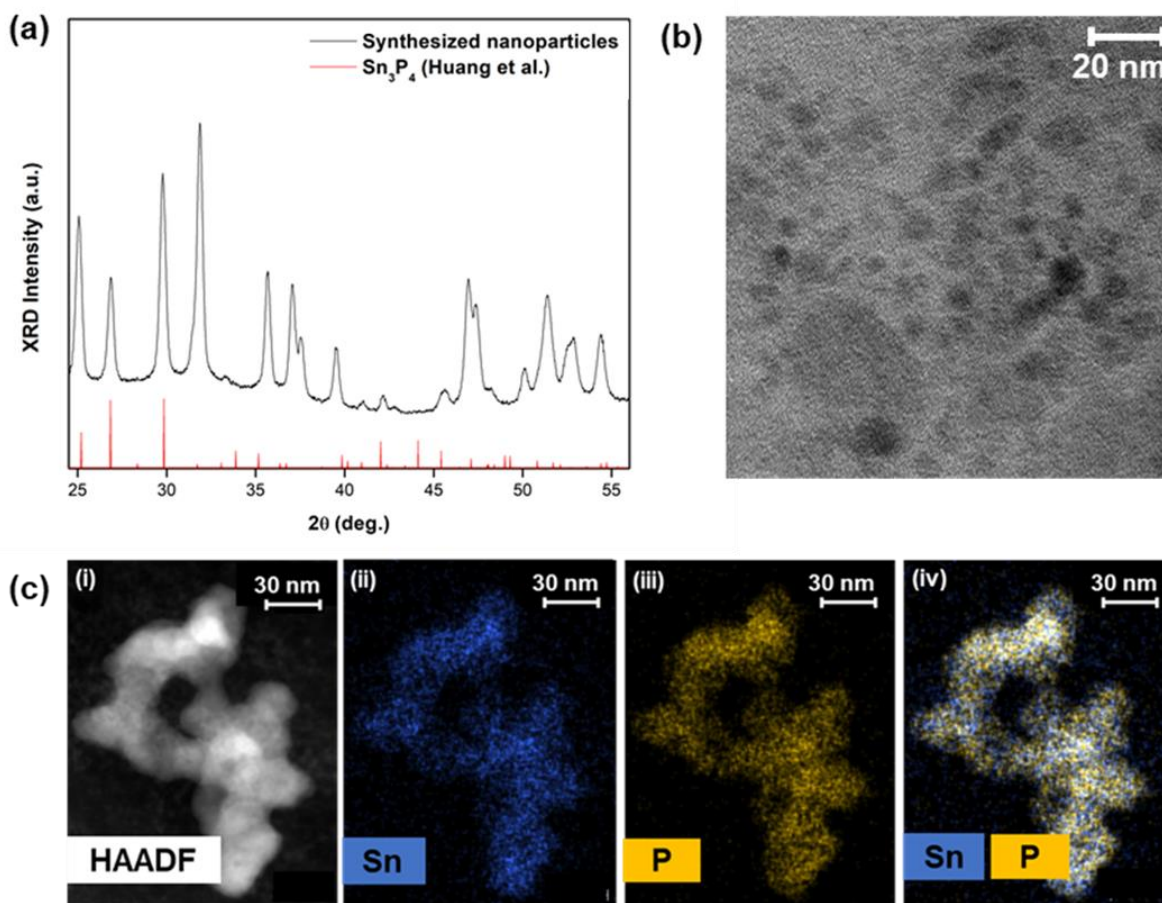

1  
 2 **Figure S7.** Phase and morphology of Sn<sub>3</sub>P<sub>4</sub> nanocrystals. (a) X-ray diffraction data (XRD)  
 3 obtained for Sn<sub>3</sub>P<sub>4</sub> nanocrystals plotted against reference data for trigonal Sn<sub>3</sub>P<sub>4</sub> provided by  
 4 Huang *et al.*<sup>4</sup> (b) Bright field TEM images for synthesized nanocrystals. (c) Scanning transmission  
 5 electron microscopy (STEM) images and energy dispersive X-ray (EDX) data for synthesized  
 6 nanocrystals.

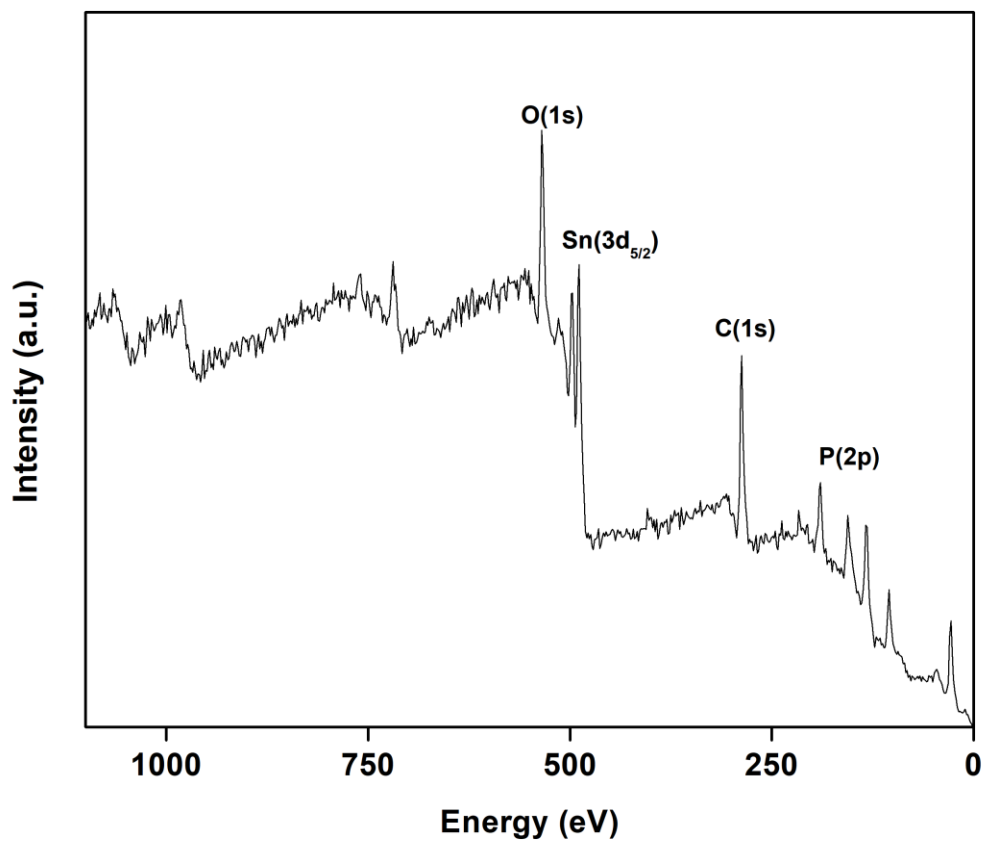

1

2 **Figure S8.** Survey data obtained for SnP measured using x-ray photoelectron spectroscopy (XPS).

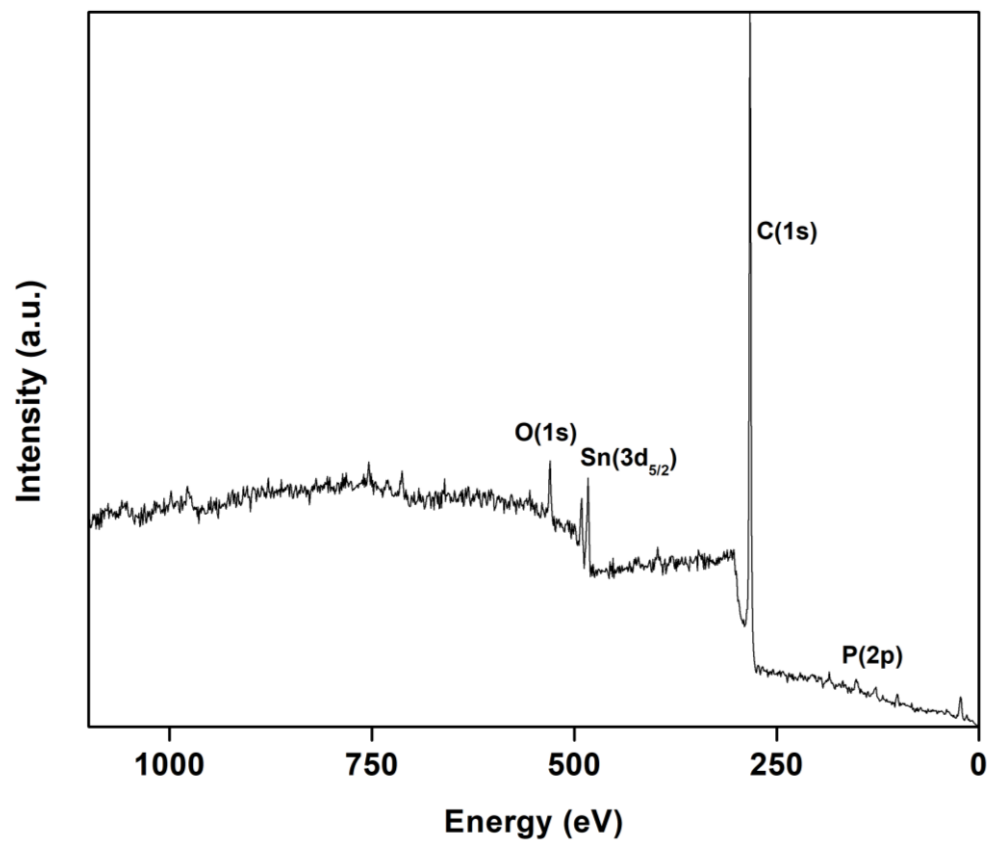

1  
2 **Figure S9.** Survey data obtained for Sn<sub>3</sub>P<sub>4</sub> measured using x-ray photoelectron spectroscopy  
3 (XPS).  
4

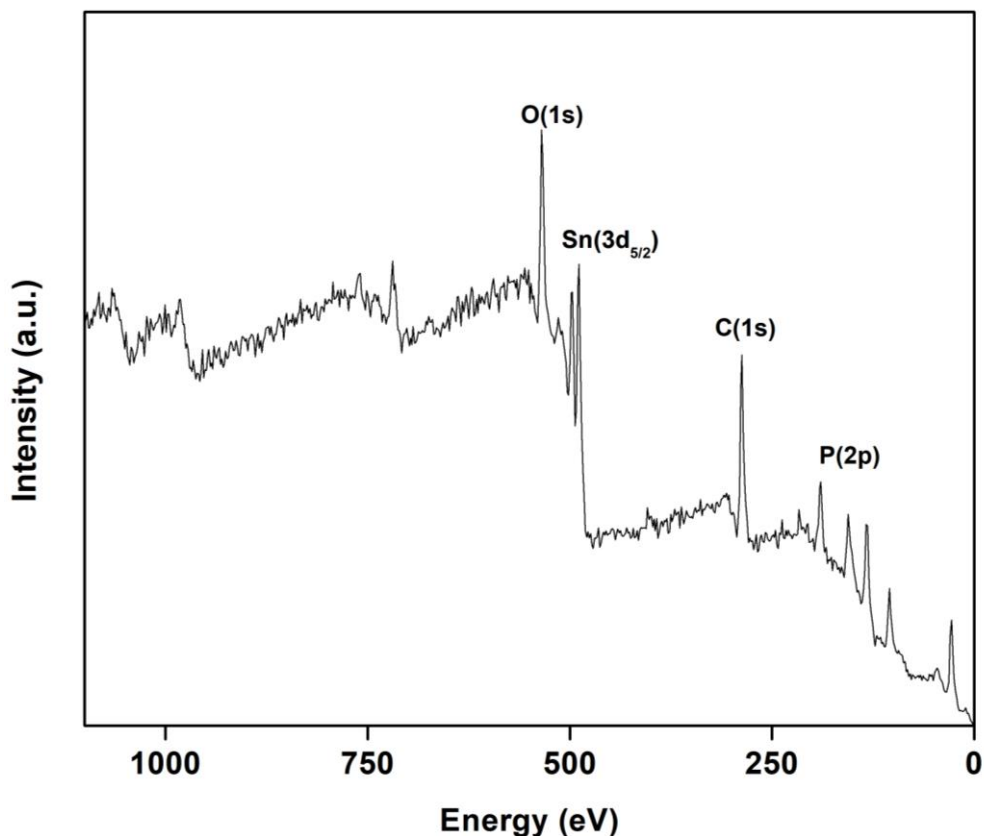

1  
2 **Figure S10.** Survey data obtained for Sn<sub>4</sub>P<sub>3</sub> measured using x-ray photoelectron spectroscopy  
3 (XPS).

4  
5  
6 **Table S2.** Best fit parameters obtained by EXAFS analysis of the  $k^2$ -weighted spectrum of the  
7 synthesized SnP. The experimental data was fit against trigonal SnP (ICSD-69026). R-factor as  
8 well as reduced  $\chi_{\text{red}}^2$  are included. SnP data were fit with an  $r$  range of 1.1 to 2.8 Å and  $k$  range of  
9 2.0 to 9.0 Å<sup>-1</sup>. Sn-O and Sn-P photoelectron paths were used in the fits.

| Structure Model  | Path | N       | R(Å)        | $\sigma^2$ (Å <sup>2</sup> ) | $\Delta E_0$ (eV) | R(%) | $\chi_{\text{red}}^2$ | $S_0^2$ |
|------------------|------|---------|-------------|------------------------------|-------------------|------|-----------------------|---------|
| SnP (ICSD-69026) | Sn-O | 0.7±0.4 | 2.02±0.18   | 0.0057±0.0068                | 7.5±0.5           | 0.4  | 11                    | 1.1     |
|                  | Sn-P | 2.9±0.7 | 2.69 ± 0.13 | 0.012±0.0034                 |                   |      |                       |         |

10

11



1

2 **Table S3.** Influence of k weighting on the obtained coordination numbers  $N$  by EXAFS analysis  
 3 of synthesized SnP. The experimental data was fit against trigonal SnP (ICSD-69026). SnP data  
 4 were fit with an  $r$  range of 1.1 to 2.8 Å and k range of 2.0 to 9.0 Å<sup>-1</sup>. Sn-O and Sn-P photoelectron  
 5 paths were used in the fits.

| Path | N       | k weighting                        |
|------|---------|------------------------------------|
| Sn-O | 0.7±0.5 | k                                  |
| Sn-P | 2.6±0.8 |                                    |
| Sn-O | 0.7±0.4 | k <sup>2</sup>                     |
| Sn-P | 2.9±0.7 |                                    |
| Sn-O | 1.0±0.6 | k <sup>3</sup>                     |
| Sn-P | 2.7±0.6 |                                    |
| Sn-O | 0.7±0.4 | k, k <sup>2</sup>                  |
| Sn-P | 2.6±0.7 |                                    |
| Sn-O | 0.8±0.4 | k <sup>2</sup> , k <sup>3</sup>    |
| Sn-P | 2.7±0.6 |                                    |
| Sn-O | 0.7±0.4 | k, k <sup>2</sup> , k <sup>3</sup> |
| Sn-P | 2.6±0.7 |                                    |

6

7

8

9

10



1 **Table S4.** Best fit parameters obtained by EXAFS analysis of the  $k^2$ -weighted spectrum of the  
 2 synthesized  $\text{Sn}_4\text{P}_3$ . The fit was performed using an Sn-P path for the rhombohedral phase of  $\text{Sn}_4\text{P}_3$   
 3 (ICSD-15014). The fits were performed using a  $k$  range of 2.3 to 11.45  $\text{\AA}^{-1}$  and an  $r$  range of 1.45  
 4 to 3  $\text{\AA}$ .

5

| Structure Model                                           | Path | N       | R( $\text{\AA}$ ) | $\sigma^2$ ( $\text{\AA}^2$ ) | $\Delta E_0$ (eV) | R (%) | $S_0^2$ | $\chi_{\text{red}}^2$ |
|-----------------------------------------------------------|------|---------|-------------------|-------------------------------|-------------------|-------|---------|-----------------------|
| <b>Sn<sub>4</sub>P<sub>3</sub></b><br><b>(ICSD-15014)</b> | Sn-P | 1.2±0.1 | 2.65±0.02         | 0.0085±0.0013                 | 6.3±0.9           | 1.3   | 1.1     | 64                    |

6

7 **Table S5.** Best fit parameters obtained by EXAFS analysis of the  $k^2$ -weighted spectrum of the  
 8 synthesized  $\text{Sn}_3\text{P}_4$ . The fit was performed using the Sn-P path for tetragonal phase of SnP (ICSD-  
 9 16077). R-factor as well as reduced  $\chi^2$  are included. The fits were performed using a  $k$  range of 2.5  
 10 to 10.5  $\text{\AA}^{-1}$  and an  $r$  range of 1.1 to 2.7  $\text{\AA}$ .

11

| Structure Model                                           | Path | N       | R( $\text{\AA}$ ) | $\sigma^2$ ( $\text{\AA}^2$ ) | $\Delta E_0$ (eV) | R(%) | $S_0^2$ | $\chi_{\text{red}}^2$ |
|-----------------------------------------------------------|------|---------|-------------------|-------------------------------|-------------------|------|---------|-----------------------|
| <b>Sn<sub>3</sub>P<sub>4</sub></b><br><b>(ICSD-16077)</b> | Sn-O | 0.3±0.3 | 2.03±0.19         | 0.0040±0.0084                 | 8.2±1.4           | 1.5  | 1.1     | 13                    |
|                                                           | Sn-P | 1.3±0.2 | 2.66±0.18         | 0.0054±0.0014                 |                   |      |         |                       |

12

13

14

## 15 References

- 16 1. B. H. Toby and R. B. Von Dreele, *J. Appl. Crystallogr.* **2013**, 46 (2), 544-549.
- 17 2. C. A. Schneider, W. S. Rasband, and K. W. Eliceiri, *Nat. Methods* **2012**, 9 (7), 671-675.
- 18 3. B. Ravel, M. Newville, *J. Synchrotron Rad.* **2005**, 12 (4), 537-541.
- 19 4. M. Huang and Y. P. Feng, *Phys. Rev. B*, 2004, **70**, 184116.
